# Supplementary material for: Stimuli-Responsive Self-Assembly of Poly(2-(Dimethylamino)ethyl Methacrylate-co-(oligo ethylene glycol)methacrylate) Random Copolymers and Their Modified Derivatives
Source: MDPI journal article supplement (doi:10.3390/polym15061519), 2023-03-19
Supplement: s1 [file s1]

## Supplementary Materials

### Stimuli-Responsive Self-Assembly of Poly(2-(dimethylamino)ethyl methacrylate-co-(oligo ethylene glycol)methacrylate) Random Copolymers and Their Modified Derivatives

Antiopei Vardaxi <sup>1,2</sup> and Stergios Pispas <sup>1\*</sup>

<sup>1</sup> Theoretical and Physical Chemistry Institute, National Hellenic Research Foundation, 48 Vassileos Constantinou Avenue, 11635, Athens, Greece; [ada.vardaxi@gmail.com](mailto:ada.vardaxi@gmail.com),

<sup>2</sup> Department of Chemistry, National and Kapodistrian University of Athens (NKUA), 15784, Athens, Greece

\* Correspondence: [pispas@eie.gr](mailto:pispas@eie.gr) ; Tel.: +30-210-7273824

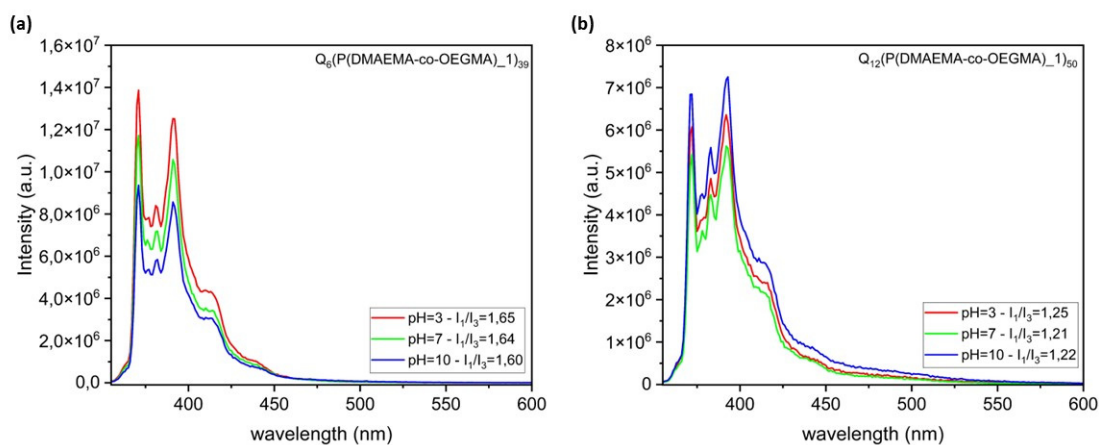

**Figure S1:** Fluorescence spectra of (a)  $Q_6(P(DMAEMA-co-OEGMA)_1)_{39}$  and (b)  $Q_{12}(P(DMAEMA-co-OEGMA)_1)_{50}$  modified random copolymers utilizing pyrene assay at different pH values and  $T = 25$  °C.

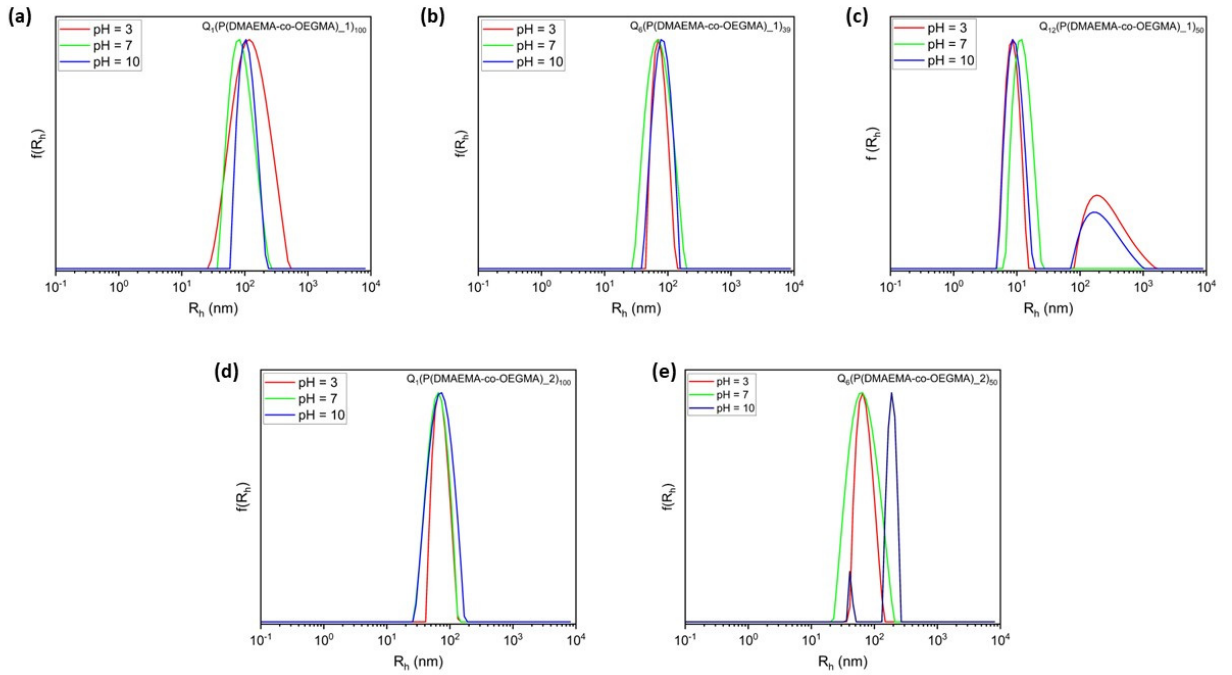

**Figure S2:** Distributions of hydrodynamic radius obtained from CONTIN analysis (at  $\theta = 90^\circ$  and pH 3, 7 and 10) for (a)  $Q_1(P(\text{DMAEMA-co-OEGMA})_1)_{100}$ , (b)  $Q_6(P(\text{DMAEMA-co-OEGMA})_1)_{39}$ , (c)  $Q_{12}(P(\text{DMAEMA-co-OEGMA})_1)_{50}$ , (d)  $Q_1(P(\text{DMAEMA-co-OEGMA})_2)_{100}$  and (e)  $Q_6(P(\text{DMAEMA-co-OEGMA})_1)_{50}$ .

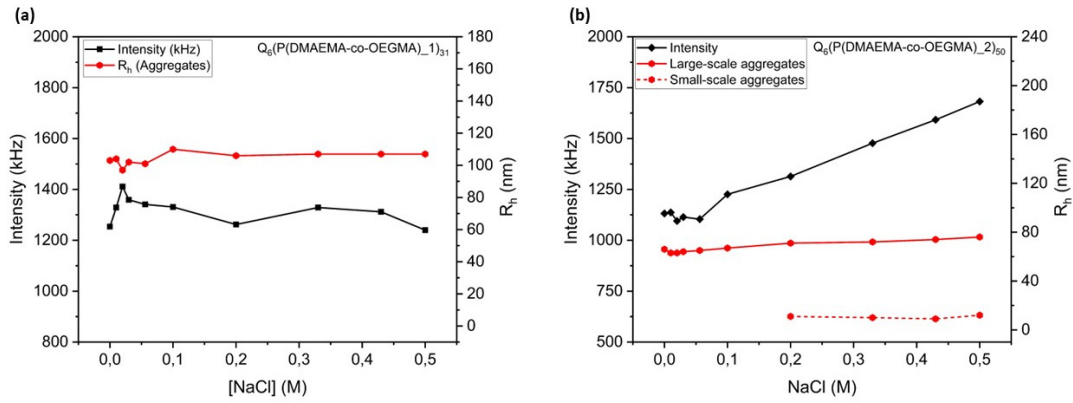

**Figure S3:** Variation of the scattering intensity and hydrodynamic radius ( $R_h$ ) as a function of ionic strength for (a)  $Q_6(P(\text{DMAEMA-co-OEGMA})_1)_{50}$  and (b)  $Q_6(P(\text{DMAEMA-co-OEGMA})_2)_{50}$  modified random copolymers.
